# Supplementary material for: Identification of a Major QTL and Validation of Related Genes for Tiller Angle in Rice Based on QTL Analysis
Source: MDPI journal article supplement (doi:10.3390/ijms23095192), 2022-05-06
Supplement: s1 [file s1]

**Table S1.** Phenotypic values of tiller angle and tiller crown width in the CNDH population and its parents, “Cheongcheong” and “Nagdong”.

| Trait            | Year | Parents      | DH Population |      |      |          |
|------------------|------|--------------|---------------|------|------|----------|
|                  |      | Cheongcheong | Nagdong       | Max. | Min. | Mean     |
| Tiller angle (°) | 2020 | 30.0±0.8     | 21.0±1.0      | 38.0 | 8.0  | 17.4±5.7 |
|                  | 2021 | 31.0±2.1     | 23.0±1.7      | 38.0 | 8.0  | 17.1±5.2 |
| Crown width (cm) | 2020 | 20.5±0.8     | 17.0±1.3      | 26.0 | 6.8  | 12.3±3.3 |
|                  | 2021 | 18.5±1.3     | 15.5±0.9      | 22.0 | 5.8  | 11.8±3.0 |

**Table S2.** The correlation of tiller angle and tiller crown width from the 120 CNDH populations in 2020 and 2021.

| Year | Plant Trait  | Tiller Angle | Crown Width | Tiller Angle | Crown Width |
|------|--------------|--------------|-------------|--------------|-------------|
| 2020 | Tiller angle | 1.000        |             |              |             |
|      | Crown width  | 0.794**      | 1.000       |              |             |
| 2021 | Tiller angle | 0.691**      | 0.682**     | 1.000        |             |
|      | Crown width  | 0.705**      | 0.790**     | 0.820**      | 1.000       |

\*\* Significant at 0.01 level.

**Table S3.** QTLs related to the tiller angle and tiller crown width of the CNDH population in two consecutive years.

| Trait        | Year | Chromosome | QTL           | Marker Interval <sup>a</sup> | LOD  | Add. Effect <sup>b</sup> | R <sup>2</sup> <sup>c</sup> | Increasing Effect <sup>d</sup> |
|--------------|------|------------|---------------|------------------------------|------|--------------------------|-----------------------------|--------------------------------|
| Tiller angle | 2020 | 9          | <i>qTA9</i>   | RM6235-RM24288               | 4.27 | 2.44                     | 0.27                        | Cheongcheong                   |
|              |      | 2          | <i>qTA2</i>   | RM13594-RM3512               | 4.26 | 1.98                     | 0.39                        | Cheongcheong                   |
|              | 2021 | 6          | <i>qTA6</i>   | RM528-RM3343                 | 3.12 | 1.60                     | 0.37                        | Cheongcheong                   |
|              |      | 9          | <i>qTA9-1</i> | RM3700-RM24288               | 7.08 | 2.52                     | 0.37                        | Cheongcheong                   |
| Crown width  | 2020 | 9          | <i>qCW9</i>   | RM6235-RM24288               | 5.66 | 1.65                     | 0.30                        | Cheongcheong                   |
|              |      | 2-1        | <i>qCW2-1</i> | RM13594-RM3512               | 3.21 | 1.10                     | 0.35                        | Cheongcheong                   |
|              | 2021 | 2-2        | <i>qCW2-2</i> | RM6-RM213                    | 3.76 | 1.08                     | 0.35                        | Cheongcheong                   |
|              |      | 9          | <i>qCW9-1</i> | RM3700-RM24288               | 6.33 | 1.43                     | 0.37                        | Cheongcheong                   |

<sup>a</sup> Marker Interval are those within the significance threshold on each border of the QTL range. <sup>b</sup> Additive effect. <sup>c</sup> Phenotypic variation explains each QTL. <sup>d</sup> Increase effect is the source of the allele causing an increase in the measured traits.

**Table S4.** Genes related to the tiller angle from the target interval RM6235–RN24288 on chromosome 9.

| RAP-ID                           | MSU-ID         | Start..End         | Description                                                                                                                               |
|----------------------------------|----------------|--------------------|-------------------------------------------------------------------------------------------------------------------------------------------|
| Os09g0410500                     | LOC_Os09g24480 | 14566850..14568219 | Similar to SfCYC2 protein (Fragment).                                                                                                     |
| Os09g0414900                     | LOC_Os09g24840 | 14828981..14830515 | Similar to GASA5-like protein (Fragment).                                                                                                 |
| Os09g0416200                     | LOC_Os09g24924 | 14887140..14893226 | Similar to Glucose transporter (Fragment).                                                                                                |
| Os09g0416800                     | LOC_Os09g24990 | 14929157..14930268 | Similar to CCR4-NOT transcription complex subunit 7 (CCR4-associated factor 1) (CAF1) (BTG1 binding factor 1).                            |
| Os09g0419200                     | LOC_Os09g25150 | 15076258..15079326 | NAD-dependent epimerase/dehydratase family protein.                                                                                       |
| Os09g0420800                     | LOC_Os09g25320 | 15160893..15162859 | Similar to Ubiquitin.                                                                                                                     |
| Os09g0420900                     | LOC_Os09g25330 | 15163139..15168798 | BTB domain containing protein.                                                                                                            |
| Os09g0422500                     | LOC_Os09g25490 | 15281320..15285893 | Similar to Cellulose synthase (Fragment).                                                                                                 |
| Os09g0423600                     | LOC_Os09g25580 | 15349074..15355640 | Similar to Monogalactosyldiacylglycerol synthase (EC 2.4.1.46).                                                                           |
| Os09g0424300                     | LOC_Os09g25620 | 15385723..15389096 | S-adenosylmethionine decarboxylase.                                                                                                       |
| Os09g0427800                     | LOC_Os09g25890 | 15532892..15535767 | Glycosyl transferase, family 20 domain containing protein.                                                                                |
| Os09g0428000                     | LOC_Os09g25900 | 15546372..15548565 | Glycosyl transferase, family 2 domain containing protein.                                                                                 |
| Os09g0431100                     | LOC_Os09g26144 | 15752949..15762817 | GPCR, family 3, metabotropic glutamate receptor-like protein.                                                                             |
| Os09g0433900                     | LOC_Os09g26380 | 15930510..15936552 | Similar to Alanine aminotransferase 2 (EC 2.6.1.2) (GPT) (Glutamic--pyruvic transaminase 2) (Glutamic--alanine transaminase 2) (ALAAT-2). |
| Os09g0434200                     | LOC_Os09g26400 | 15944563..15947917 | Zinc finger, RING-type domain containing protein.                                                                                         |
| Os09g0434500                     | LOC_Os09g26420 | 15959434..15962646 | Similar to Ethylene response factor 2.                                                                                                    |
| Os09g0437400 ( <i>OsSAURq9</i> ) | LOC_Os09g26610 | 16143938..16144535 | Auxin responsive SAUR protein family protein.                                                                                             |
| Os09g0441900                     | LOC_Os09g26999 | 16411151..16415851 | Whey acidic protein, core region domain containing protein.                                                                               |
| Os09g0442700                     | LOC_Os09g27060 | 16461644..16467575 | SNF2-related domain containing protein.                                                                                                   |
| Os09g0442900                     | LOC_Os09g27080 | 16477066..16481692 | Similar to Axi 1 (Auxin-independent growth promoter)-like protein.                                                                        |

**Table S5.** List of primers used in this study.

| Name                           | Forward Primer (5'-3') | Reverse Primer (5'-3') |
|--------------------------------|------------------------|------------------------|
| <i>Os09g0410500</i>            | CAGCAGCATCAGTACGACCA   | GTTTCTTGCCGCCGTCAG     |
| <i>Os09g0414900</i>            | CATTGCATGGTTTGTCCAAG   | GTTGTTGTAGCAGGGGCACT   |
| <i>Os09g0416200</i>            | GCGGTGAACCTCTTCTTCAC   | TCCATAGGAGCACCATCTCC   |
| <i>Os09g0416800</i>            | ACCTTCTCGAATGAGCATGG   | GTAACCCAGCGAACCTCAGA   |
| <i>Os09g0419200</i>            | AAGCTCTTCCCCGAGTATCC   | AGGCTCTTCACCGTCTCGTA   |
| <i>Os09g0420800</i>            | TTTGTTCACTGTGCGAGGAC   | TTCTCCTCAACACGCTCCTT   |
| <i>Os09g0420900</i>            | CTTGGTCCGAAGAGCTGAAG   | TCTCCCCTTGGAATTGACAG   |
| <i>Os09g0422500</i>            | CCGTCGAGATCTTCTTCAGC   | CAAACCTCGCAAACGTGCTAA  |
| <i>Os09g0423600</i>            | AGTCCTTGGTGAACCCACTG   | ATGGCCTCTGCAATTGTACC   |
| <i>Os09g0424300</i>            | TGAGCTTGCTGCAGAGTTGT   | GAGTGTAACCATGGGCTGCT   |
| <i>Os09g0427800</i>            | GCATCCGTGTGCATTAGAGA   | GTCTCCTTCGCCTCGATGTA   |
| <i>Os09g0428000</i>            | CTGTGCCCTCCGGACATACT   | GCTCAGCCTCAGGAACAAAC   |
| <i>Os09g0431100</i>            | CCTCAAGTCCTACTGCGACA   | GCTCGATGAGGTTTCATCTCC  |
| <i>Os09g0433900</i>            | TCAATTTCTTTGCGGAGGTT   | TCCATCAGCAACTGCTTCAC   |
| <i>Os09g0434200</i>            | GGCTTGTTGCCCAGAATTTA   | TCCATCCACTGTCATGGTGT   |
| <i>Os09g0434500</i>            | GCAAGAAAGCCAAGGTCAAC   | CGAATGTCTCAGTGGAAGCA   |
| <i>Os09g0437400 (OsSAURq9)</i> | GAGGAAGACGAGGAGGTGGT   | AGGTACCTCGTCGGGATCA    |
| <i>Os09g0441900</i>            | GCACAGATCTTGCCGTCTTT   | GGTTTACAGCATGAGCAGCA   |
| <i>Os09g0442700</i>            | GGTTTCTTGCCCATCTCAA    | TTTGGGCATGAATTTCTCC    |
| <i>Os09g0442900</i>            | CCCTTGCAACAAAAGAGGAA   | CCCAAGACATCCTTCCTTCA   |
| <i>OsPIN1</i>                  | GAAGGACAGGGAGGACTACG   | TGAGGCTGGAGTAGGTGTTT   |
| <i>LAZY1</i>                   | GCCACTGGATCAAGACTGA    | TGTAACAGCAAGCACATATTC  |
| <i>qHOX1</i>                   | AGCACAACACCCTCAATC     | GTTCTGGAACCACACCTC     |
| <i>qHOX28</i>                  | CATTGACCACCCTCACAA     | GAATCCGCACAAGAAGTCTG   |
| <i>TAC1</i>                    | GAGATGGCTCTAAAGGTGTTC  | CGTGCCAATTGCAAGTATACC  |
| <i>TAC4</i>                    | AAGGTCGCAACAAGCAG      | AACTGCCAGGAGCAGAGAG    |
| <i>OsActin</i>                 | CGTCCTCCTGCTTGTCTCTC   | TAGGCCGGTTGAAAACCTTG   |
